# Supplementary material for: Discovery of Novel Conotoxin Candidates Using Machine Learning
Source: Preprints.org preprint supplement (doi:10.20944/preprints201809.0587.v1), 2018-09-29
Supplement: Supplementary file 1 [file supplementary]

## Sheet: sn.format
supFamSensitivity	Overlap.4methods	Overlap.LSP	Overlap.LSB	Overlap.LPB	Overlap.SPB	Overlap.LS	Overlap.LP	Overlap.SP	Overlap.LB	Overlap.SB	Overlap.PB	Logit	LabelSpreading-SemiS	Perceptron-NeuroNetWork	BLASTP	Union.4methods	Union.LSP	Union.LSB	Union.LPB	Union.SPB	Union.LS	Union.LP	Union.SP	Union.LB	Union.SB	Union.PB
A2	0.5	0.5	0.5	1	0.5	0.5	1	0.5	1	0.5	1	1	0.5	1	1	1	1	1	1	1	1	1	1	1	1	1
A	0.253918	0.253918	0.260188	0.981191	0.253918	0.260188	0.981191	0.253918	0.987461	0.260188	0.981191	0.987461	0.260188	0.981191	0.987461	0.987461	0.987461	0.987461	0.987461	0.987461	0.987461	0.987461	0.987461	0.987461	0.987461	0.987461
B2	0	0	0	0.0322581	0	0	0.0322581	0	0.0322581	0.0645161	0.258065	0.0322581	0.0645161	0.258065	0.935484	0.935484	0.322581	0.935484	0.935484	0.935484	0.0967742	0.258065	0.322581	0.935484	0.935484	0.935484
B4	0	0	0	0	0	0	0	0	0.555556	0.0555556	0	0.555556	0.0555556	0	1	1	0.611111	1	1	1	0.611111	0.555556	0.0555556	1	1	1
B	0	0	0	0.492308	0	0	0.492308	0	0.492308	0.0153846	0.538462	0.492308	0.0153846	0.538462	0.815385	0.815385	0.553846	0.815385	0.815385	0.815385	0.507692	0.538462	0.553846	0.815385	0.815385	0.815385
C	0.333333	0.333333	0.333333	1	0.333333	0.333333	1	0.333333	1	0.333333	1	1	0.333333	1	1	1	1	1	1	1	1	1	1	1	1	1
Conikotikot	0.136364	0.136364	0.136364	0.909091	0.142857	0.136364	0.909091	0.142857	0.909091	0.142857	0.915584	0.909091	0.142857	0.915584	0.915584	0.915584	0.915584	0.915584	0.915584	0.915584	0.915584	0.915584	0.915584	0.915584	0.915584	0.915584
Conkunitzin	0.227848	0.227848	0.227848	0.898734	0.240506	0.227848	0.898734	0.240506	0.898734	0.240506	0.962025	0.898734	0.240506	0.962025	1	1	0.962025	1	1	1	0.911392	0.962025	0.962025	1	1	1
Conocap	0	0	0	0	0	0.5	0	0	0	0	0	0.5	0.5	0	0	0.5	0.5	0.5	0.5	0.5	0.5	0.5	0.5	0.5	0.5	0
Conodipine	0	0	0.0169492	0	0	0.0169492	0	0	0.0169492	0.0508475	0	0.0169492	0.0508475	0	0.762712	0.762712	0.0508475	0.762712	0.762712	0.762712	0.0508475	0.0169492	0.0508475	0.762712	0.762712	0.762712
Conohyal	0	0	0	0	0	0	0	0	0	0	0.666667	0	0	0.666667	0.833333	0.833333	0.666667	0.833333	0.833333	0.833333	0	0.666667	0.666667	0.833333	0.833333	0.833333
cono-NPY	1	1	1	1	1	1	1	1	1	1	1	1	1	1	1	1	1	1	1	1	1	1	1	1	1	1
Conoporin	0	0	0	0	0	0	0	0	0.0392157	0	0	0.0392157	0	0	0.921569	0.921569	0.0392157	0.921569	0.921569	0.921569	0.0392157	0.0392157	0	0.921569	0.921569	0.921569
Conopressin	0.0540541	0.0540541	0.0540541	1	0.0540541	0.0540541	1	0.0540541	1	0.0540541	1	1	0.0540541	1	1	1	1	1	1	1	1	1	1	1	1	1
Conorfamide	0	1	0	0	0	1	1	1	0	0	0	1	1	1	0	1	1	1	1	1	1	1	1	1	1	1
D	0.354167	0.354167	0.354167	1	0.354167	0.354167	1	0.354167	1	0.354167	1	1	0.354167	1	1	1	1	1	1	1	1	1	1	1	1	1
DivMKFPLLFISL	0.612903	0.612903	0.612903	1	0.612903	0.612903	1	0.612903	1	0.612903	1	1	0.612903	1	1	1	1	1	1	1	1	1	1	1	1	1
DivMKLCVVIVLL	0.333333	0.333333	0.333333	1	0.333333	0.333333	1	0.333333	1	0.333333	1	1	0.333333	1	1	1	1	1	1	1	1	1	1	1	1	1
DivMKLLLTLLLG	0	0	0	1	0	0	1	0	1	0	1	1	0	1	1	1	1	1	1	1	1	1	1	1	1	1
DivMKVAVVLLVS	0.285714	0.285714	0.285714	1	0.285714	0.285714	1	0.285714	1	0.285714	1	1	0.285714	1	1	1	1	1	1	1	1	1	1	1	1	1
DivMRCLSIFVLL	1	1	1	1	1	1	1	1	1	1	1	1	1	1	1	1	1	1	1	1	1	1	1	1	1	1
DivMRFLHFLIVA	1	1	1	1	1	1	1	1	1	1	1	1	1	1	1	1	1	1	1	1	1	1	1	1	1	1
DivMRFYIGLMAA	0.125	0.125	0.125	1	0.125	0.125	1	0.125	1	0.125	1	1	0.125	1	1	1	1	1	1	1	1	1	1	1	1	1
DivMSKLVILAVL	0.285714	0.285714	0.285714	1	0.285714	0.285714	1	0.285714	1	0.285714	1	1	0.285714	1	1	1	1	1	1	1	1	1	1	1	1	1
DivMTAKATLLVL	1	1	1	1	1	1	1	1	1	1	1	1	1	1	1	1	1	1	1	1	1	1	1	1	1	1
DivMTFLLLLVSV	0	1	0	0	0	1	1	1	0	0	0	1	1	1	0	1	1	1	1	1	1	1	1	1	1	1
DivMTLTFLLVVA	1	1	1	1	1	1	1	1	1	1	1	1	1	1	1	1	1	1	1	1	1	1	1	1	1	1
E	0.394737	0.394737	0.394737	0.921053	0.394737	0.394737	0.921053	0.394737	0.921053	0.394737	0.921053	0.921053	0.394737	0.921053	0.921053	0.921053	0.921053	0.921053	0.921053	0.921053	0.921053	0.921053	0.921053	0.921053	0.921053	0.921053
F	0	0	0	0.893617	0	0	0.893617	0	0.893617	0	0.957447	0.893617	0	0.957447	1	1	0.957447	1	1	1	0.893617	0.957447	0.957447	1	1	1
G	0.833333	1	0.833333	0.833333	0.833333	1	1	1	0.833333	0.833333	0.833333	1	1	1	0.833333	1	1	1	1	1	1	1	1	1	1	1
H	0.282609	0.282609	0.282609	0.434783	0.282609	0.282609	0.434783	0.282609	0.608696	0.304348	0.434783	0.608696	0.304348	0.434783	0.978261	0.978261	0.630435	0.978261	0.978261	0.978261	0.630435	0.608696	0.456522	0.978261	0.978261	0.978261
I1	0.376344	0.376344	0.376344	0.956989	0.376344	0.376344	0.956989	0.376344	0.956989	0.376344	0.956989	0.956989	0.376344	0.956989	0.956989	0.956989	0.956989	0.956989	0.956989	0.956989	0.956989	0.956989	0.956989	0.956989	0.956989	0.956989
I2	0.0932203	0.0932203	0.0932203	0.974576	0.0932203	0.0932203	0.983051	0.0932203	0.974576	0.0932203	0.974576	0.983051	0.0932203	0.983051	0.974576	0.983051	0.983051	0.983051	0.983051	0.983051	0.983051	0.983051	0.983051	0.983051	0.974576	0.983051
I3	0.243243	0.243243	0.27027	0.891892	0.243243	0.27027	0.891892	0.243243	0.918919	0.27027	0.891892	0.918919	0.27027	0.891892	0.918919	0.918919	0.918919	0.918919	0.918919	0.918919	0.918919	0.918919	0.918919	0.918919	0.918919	0.918919
I4	0.218182	0.218182	0.236364	0.690909	0.218182	0.236364	0.690909	0.218182	0.745455	0.290909	0.727273	0.745455	0.290909	0.727273	1	1	0.836364	1	1	1	0.8	0.781818	0.8	1	1	1
Insulin	0.09375	0.09375	0.09375	0.984375	0.09375	0.09375	0.984375	0.09375	0.984375	0.09375	0.984375	0.984375	0.09375	1	0.984375	1	1	0.984375	1	1	0.984375	1	1	0.984375	0.984375	1
J	0.188406	0.188406	0.188406	1	0.188406	0.188406	1	0.188406	1	0.188406	1	1	0.188406	1	1	1	1	1	1	1	1	1	1	1	1	1
K	0.230769	0.230769	0.230769	1	0.230769	0.230769	1	0.230769	1	0.230769	1	1	0.230769	1	1	1	1	1	1	1	1	1	1	1	1	1
L11	0	0	0	0.75	0	0	0.75	0.0833333	0.75	0	0.916667	0.75	0.0833333	1	0.916667	1	1	1	1	1	0.833333	1	1	0.916667	1	1
L	0.534247	0.547945	0.534247	0.986301	0.534247	0.547945	1	0.547945	0.986301	0.534247	0.986301	1	0.547945	1	0.986301	1	1	1	1	1	1	1	1	1	1	1
M	0.0864486	0.0876168	0.0946262	0.892523	0.0864486	0.0957944	0.893692	0.0876168	0.962617	0.0981308	0.892523	0.963785	0.0992991	0.893692	0.977804	0.978972	0.96729	0.978972	0.978972	0.978972	0.96729	0.963785	0.905374	0.978972	0.978972	0.978972
Mr30	0.5	0.5	0.5	0.75	0.5	0.5	0.75	0.5	0.75	0.5	0.75	0.75	0.5	0.75	0.75	0.75	0.75	0.75	0.75	0.75	0.75	0.75	0.75	0.75	0.75	0.75
N	0.597701	0.609195	0.597701	0.988506	0.597701	0.609195	1	0.609195	0.988506	0.597701	0.988506	1	0.609195	1	0.988506	1	1	1	1	1	1	1	1	1	1	1
O1	0.202765	0.203917	0.202765	0.975806	0.206221	0.203917	0.976959	0.207373	0.975806	0.206221	0.979263	0.976959	0.207373	0.980415	0.979263	0.980415	0.980415	0.980415	0.980415	0.980415	0.980415	0.980415	0.980415	0.980415	0.980415	0.980415
O2	0.260479	0.260479	0.263473	0.976048	0.260479	0.263473	0.976048	0.260479	0.979042	0.263473	0.976048	0.979042	0.263473	0.976048	0.979042	0.979042	0.979042	0.979042	0.979042	0.979042	0.979042	0.979042	0.979042	0.979042	0.979042	0.979042
O3	0.367647	0.367647	0.367647	1	0.367647	0.367647	1	0.367647	1	0.367647	1	1	0.367647	1	1	1	1	1	1	1	1	1	1	1	1	1
P	0.355422	0.355422	0.355422	0.921687	0.355422	0.355422	0.921687	0.355422	0.921687	0.355422	0.921687	0.921687	0.355422	0.921687	0.921687	0.921687	0.921687	0.921687	0.921687	0.921687	0.921687	0.921687	0.921687	0.921687	0.921687	0.921687
Prohormone_4	0	0	0	0	0	0	0	0	0	0	0	0	0	0	0.25	0.25	0	0.25	0.25	0.25	0	0	0	0.25	0.25	0.25
Q	0.266667	0.3	0.266667	0.966667	0.266667	0.3	1	0.3	0.966667	0.266667	0.966667	1	0.3	1	0.966667	1	1	1	1	1	1	1	1	1	1	1
SF-04	0.344828	0.344828	0.344828	1	0.344828	0.344828	1	0.344828	1	0.344828	1	1	0.344828	1	1	1	1	1	1	1	1	1	1	1	1	1
S	0.425532	0.468085	0.425532	0.829787	0.425532	0.468085	0.87234	0.468085	0.829787	0.425532	0.829787	0.87234	0.468085	0.87234	0.829787	0.87234	0.87234	0.87234	0.87234	0.87234	0.87234	0.87234	0.87234	0.87234	0.87234	0.87234
SF-mi1	0.235294	0.235294	0.235294	1	0.235294	0.235294	1	0.235294	1	0.235294	1	1	0.235294	1	1	1	1	1	1	1	1	1	1	1	1	1
SF-mi2	0.540541	0.540541	0.540541	0.756757	0.540541	0.540541	0.756757	0.540541	0.918919	0.540541	0.756757	0.918919	0.540541	0.756757	1	1	0.918919	1	1	1	0.918919	0.918919	0.756757	1	1	1
Teretoxin	0	1	0	0	0	1	1	1	0	0	0	1	1	1	0	1	1	1	1	1	1	1	1	1	1	1
T	0.32	0.32	0.32	0.96	0.32	0.32	0.96	0.32	0.96	0.322667	0.965333	0.96	0.322667	0.965333	0.968	0.968	0.968	0.968	0.968	0.968	0.962667	0.965333	0.968	0.968	0.968	0.968
U	0.433333	0.466667	0.433333	0.933333	0.433333	0.466667	0.966667	0.466667	0.966667	0.433333	0.933333	1	0.466667	0.966667	0.966667	1	1	1	1	1	1	1	0.966667	1	1	1
V	0.1875	0.1875	0.1875	0.984375	0.1875	0.1875	0.984375	0.1875	0.984375	0.1875	0.984375	0.984375	0.1875	0.984375	0.984375	0.984375	0.984375	0.984375	0.984375	0.984375	0.984375	0.984375	0.984375	0.984375	0.984375	0.984375
Y	0.176471	0.176471	0.176471	1	0.176471	0.176471	1	0.176471	1	0.176471	1	1	0.176471	1	1	1	1	1	1	1	1	1	1	1	1	1
